# Potassium nutrition recover impacts on stomatal, mesophyll and biochemical limitations to photosynthesis in *Carya cathayensis* and *Hickory illinoensis*

Chao Shen<sup>1</sup>, Ruimin Huang<sup>1</sup>, Yiquan Tang<sup>1</sup>, Zhengjia Wang<sup>1\*</sup>

<sup>1</sup> State Key Laboratory of Subtropical Silviculture, Zhejiang A&F University, Lin'an, Hangzhou 311300, China

## Abstract

Potassium (K) influences the photosynthesis process in a number of ways; However, the mechanism of photosynthetic response to the long-term supply of potassium is not yet clear. Concurrent measurements of gas exchange and chlorophyll fluorescence were made to investigate the effect of potassium nutrition on photosynthetic efficiency and stomatal conductance ( $g_s$ ), mesophyll conductance ( $g_m$ ) in Pecan (*Carya illinoensis* K.Koch) and Hickory (*Carya cathayensis* Sarg.) seedlings in a greenhouse. The results show that the photosynthetic capacity of Pecan and Hickory plants was not limited when the leaves had potassium concentrations  $>1.4\%$  and  $1.42\%$  of dry weight. Most of limitation under potassium deficiency were dominated by MCL for Pecan and Hickory. Both cultivars showed remarkable improvement in  $S_L$ ,  $MC_L$ ,  $J$  and  $V_{c,max}$  with additional K supplies. However, effect from potassium deficiency on photosynthesis in plant leaves was irreversible. All of  $S_L$ ,  $MC_L$ , and  $B_L$  nearly half down with recovery K supply in both species. These results emphasize the important role of potassium on regulation of photosynthesis by three limitations.

**Key words:** *Carya cathayensis* Sarg., *Hickory illinoensis* K.Koch., potassium deficiency, recover, photosynthetic limitations.

## Introduction

Pecan (*Hickory illinoensis* K.Koch), one of the world's efficient economic trees, can provides high quality dried fruit, good wood and other products. In China, pecan has been introduced for more than 100 years (Shi et al. 2013), and pecan have been grown in all parts of Zhejiang Province. Fruit trees are potassium sensitive crops, and their normal growth and development need adequate potassium supply. Potassium deficiency largely restricts the improvement of fruit quality. (Zhang 2016, Shen et al. 2017). However, the total potassium content of this region is low, resulting in less efficient potassium that can be absorbed and utilized by plants (Cong et al. 2016). Potassium content in plant leaves is closely related to photosynthesis (Wood et al. 2016), most

32 studies have focused on crops (Pettigrew et al. 2010, Lu et al. 2016, Sousa et al. 2010, Li et al.  
33 2014), while few studies have been done on fruit trees.

34 Potassium is one of the three microelement of plant nutrition. It is different from nitrogen and  
35 phosphorus, that exists mainly in the form of soluble inorganic salt in the cell fluid (Blevins et al.  
36 1985), or adsorbed on the surface of the plasma colloid in the form of ions, and has no structural  
37 purpose (Tester et al. 2001).  $K^+$  is an activator of more than 60 enzymes in plants (Berg et al., 2010;  
38 Hu et al., 2015; Wang and Wu, 2013), including enzymes that alter carbohydrate metabolism and  
39 nitrogen metabolism, and promote protein and nucleic acid synthesis (Amtmann et al., 2008;  
40 Maathuis 1997). Potassium (such as potassium nitrate, potassium chloride and potassium citrate)  
41 is the main regulator of vacuole osmotic regulation in vacuoles (Hsiao and Läuchli 1986),  
42 regulating cell water potential and turgor pressure, thus affecting plant stomatal opening and  
43 closing movement(Jordan et al., 2008; Peiter 2011). Therefore, potassium deficiency affects  
44 various plant metabolism and osmotic adjustment, resulting in decreased leaf area, plant thin,  
45 yellow leaf wilting, ultimately inhibit the plant growth and yield formation. (Severtson et al.,  
46 2016).

47  $K^+$  as the main regulator of guard cell permeability, its richness affects stomatal function  
48 (Shavala, 2003; Lebaudy et al. 2008; Andrés et al. 2008), thereby affecting the exchange process  
49 of the blade and outside the water and gas. Therefore, stomatal limitation was thought to be the  
50 primary cause of the decrease in leaf photosynthetic rate due to potassium deficiency (Bednarz et,  
51 al. 1998).But the research in apricot showed that leaf photosynthetic rate decreased significantly  
52 under potassium starvation (Basile et al. 2003; Oosterhuis et al. 2014; Quentin et al. 2013; Flexas et  
53 al. 2015), but the stomatal conductance is not affected, and the biochemical disorders caused by  
54 inadequate supply of potassium is the main reason that limit the photosynthetic rate (Basile et al.  
55 2003; Flexas et al. 2012). Potassium deficiency decreased leaf chlorophyll content, decreased  
56 Rubisco activity, accelerate the generation of reactive oxygen species (ROS), may also lead to the  
57 accumulation of photosynthetic products and feedback inhibition of leaf net photosynthetic rate  
58 (Paul et al. 2003; Cakmak 2005; Araya et al., 2006; Battie-Laclau et al. 2013; Vislap et al. 2012).In  
59 recent decades, with the in-depth research on the mesophyll conductance (Bernacchi et al., 2010;  
60 Flexas et al., 2007; Galmés et al., 2007; Xiong et al., 2016), people gradually realize that  
61 potassium plays an important role in the regulation of mesophyll conductance under potassium

deficiency leads to reduced mesophyll conductance on leaf photosynthetic rate limit as due to stomatal function limited (Song et al., 2011; Battie-Laclau et al., 2014). Thus, the dominant limiting factor of potassium deficiency on photosynthesis has a significant effect on the surface, this effect is based on the three factors in proportion to the size of the plant, but is regulated by internal features, including changes in the degree of stress and porosity, the resulting mesophyll layer and the physiological and biochemical characteristics.

Recently, a quantitative limitation analysis for the RuBP-limited phase of photosynthesis was proposed (Chen et al., 2013; Christian et al., 2014; Wang et al., 2015; Song et al., 2013; Wang et al., 2012). In this way, the quantitative analysis of photosynthesis limitation was conducted by combining stomatal conductance and mesophyll conductance (Song et al., 2011; Tosens et al., 2012), the total photosynthesis limitation of leaves can be divided into three components:  $A_L = S_L + M_L + B_L$ ,  $S_L$ ,  $M_L$ ,  $B_L$ , stomata, mesophyll, and biochemical limitation, respectively. To date, most studies on quantitative analysis of photosynthetic restriction have focused on crops (Sagardoy et al., 2010; Pettigrew et al., 2010; Lu et al., 2016; Sousa et al., 2010), and most of them compare genetically modified species and genotypes with large variation in leaf structure. Nevertheless, the information related to the influence of nutrient deficiency on quantitative limitation analysis for photosynthesis is missing. Previous study showed a relationship between potassium and photosynthesis in plant leaves of Pecan and Brassica napus, but do not involve the effect of potassium deficiency time on photosynthesis of leaves. For this reasons, it is desirable to develop a better understanding of the mechanisms which K supply affects photosynthesis of leaves.

## Materials and methods

### *Plants materials and growth conditions*

Two-year-old pecan seedlings (*Hickory illinoensis K.Koch*) were transplanted into 30.5 cm tall plastic pots with a top diameter of 25 cm, containing full-strength nutrient solution. The composition of the standard nutrient solution was as follows: 2.5 mM  $\text{Ca}(\text{NO}_3)_2$ , 0.5 mM  $\text{Ca}(\text{H}_2\text{PO}_4)_2$ , 1.0 mM  $\text{MK}_2\text{SO}_4$ , 0.5 mM  $\text{MgSO}_4$ , 12.5  $\mu\text{M}$   $\text{H}_3\text{BO}_3$ , 1.0  $\mu\text{M}$   $\text{MnSO}_4$ , 1.0  $\mu\text{M}$   $\text{ZnSO}_4$ , 0.25  $\mu\text{M}$   $\text{CuSO}_4$ , 0.1  $\mu\text{M}$   $(\text{NH}_4)_6\text{Mo}_7\text{O}_{24}$  and 10  $\mu\text{M}$  EDTA-Fe. The seedlings were grown in a greenhouse with natural sunlight during the day. The mean daytime maximum and minimum temperatures in the greenhouse were 28 and 20°C, with a constant relative humidity of 60%. After

2 months, the composition of the nutrient solution was altered to one of three K concentrations:0, 2.0 and 5.0 mM K, respectively. In all cases, Ca(OH)<sub>2</sub> and HCl were used to adjust the pH of the nutrient solution to 5.7. The nutrient solution was changed every 7 days. All the treatments had 10 replicates with a completely random design.

### Leaf gas exchange and fluorescence measurements

Measurements were made on the youngest fully expanded leaf from 6–8 randomly selected seedlings on the 60th day of the treatment, using leaves developed after the initiation of the K nutrition treatment. Leaf gas exchange and chlorophyll fluorescence were measured simultaneously using a portable infrared gas analyser system (Li-6400, Li-Cor, Lincoln, NE, USA) equipped with an integrated leaf chamber fluorometer (Li-6400-40) at a concentration of 380  $\mu\text{mol mol}^{-1}$  CO<sub>2</sub>, 21% O<sub>2</sub> and 50% relative humidity. Leaf chamber temperature was maintained at 28 °C. All measurements were carried out at 1200  $\mu\text{mol m}^{-2} \text{s}^{-1}$ , with 90% red light and 10% blue light, which we previously determined to be just above light saturation for pecan seedlings. Once a steady state was reached (~20 min at a photosynthetic photon flux density (PPFD) of 1200  $\mu\text{mol m}^{-2} \text{s}^{-1}$ ), a CO<sub>2</sub> response curve (A–C<sub>i</sub> curve) was performed. The ambient CO<sub>2</sub> concentration (C<sub>a</sub>) was lowered stepwise from 380 to 50  $\mu\text{mol mol}^{-1}$ , and then returned to 380  $\mu\text{mol mol}^{-1}$  to re-establish the initial steady-state value of photosynthesis. C<sub>a</sub> was then increased stepwise from 380 to 1800  $\mu\text{mol mol}^{-1}$ . At each C<sub>a</sub>, photosynthesis was allowed to stabilize for 3–4 min until gas exchange was steady, so that each curve was completed in 35–50 min. Corrections for the leakage of CO<sub>2</sub> in and out of the Li-6400 leaf chamber, as described by Perez-Martin et al. (2009), were applied to all gas-exchange data.

The actual photochemical efficiency of photosystem II ( $\Phi_{\text{PSII}}$ ) was determined by measuring steady-state fluorescence ( $F_s$ ) and maximum fluorescence during a light-saturating pulse ( $F'_m$ ) following the procedure of Genty et al. (1989):

$$\Phi_{\text{PSII}} = (F'_m - F_s) / F'_m \quad (1)$$

The rate of electron transport estimated from chlorophyll fluorescence is given by the equation (Bilger and Björkman 1994)

$$J = \Phi_{\text{PSII}} \cdot \text{PPFD} \cdot \alpha \cdot \beta \quad (2)$$

where PPFD is the photosynthetic photon flux density,  $\alpha$  is leaf absorptance and  $\beta$  is the proportion of quanta absorbed by photosystem II.  $\alpha \cdot \beta$  was determined for each treatment from the

slope of the relationship between  $\Phi_{PSII}$  and  $\Phi_{CO_2}$  (i.e., the quantum efficiency of gross  $CO_2$  fixation), which was obtained by varying light intensity under non-photo respiratory conditions in an atmosphere containing <1%  $O_2$  (Valentini et al.1995).

# ***Measurement of mitochondrial respiration rate in the light ( $R_d$ ) and intercellular $CO_2$ compensation point ( $C_i^*$ )***

$R_d$  and  $C_i^*$  were determined according to the method of Laisk (1977).  $A-C_i$  curves were measured using an open gas-exchange system (Li-6400, Li-Cor Inc.) equipped with an integrated light source (Li-6400-02) at three different photosynthetically active PPFDs (50, 200 and 500  $mmol\ m^{-2}\ s^{-1}$ ) at six different  $CO_2$  levels ranging from 300 to 50  $mmol\ CO_2\ mol^{-1}$  air. The curves intersected at the point where  $A$  is the same at different PPFDs; therefore,  $A$  at that point represents  $R_d$ , and  $C_i$  represents  $C_i^*$ .

# ***Estimation of $g_m$***

From combined gas-exchange and chlorophyll fluorescence measurements, the mesophyll conductance for  $CO_2$  ( $g_m$ ) was estimated according to Harley et al. (1992) as

$$g_m = A / (C_i - \Gamma^* (J + 8(A + R_d)) / (J - 4(A + R_d))) \quad (3)$$

where  $A$ ,  $C_i$ ,  $R_d$  and  $J$  were determined as previously described for each treatment.  $\Gamma^*$  is the chloroplastic  $CO_2$  photocompensation point calculated from the  $C_i^*$  and  $R_d$  measurements according to the method of Warren et al. (2007) using a simultaneous equation with  $g_m$ :

$$\Gamma^* = C_i^* + R_d / g_m \quad (4)$$

Equation (4) was then substituted into (3) and the value of  $g_m$  was found; then  $\Gamma^*$  was calculated. The value of  $\Gamma^*$  was found to be slightly higher for the K0-treated plants ( $53.9 \pm 9.6\ \mu mol\ mol^{-1}$ ), compared with the four other treatments ( $47.3 \pm 7.5$ ,  $44.9 \pm 7.8$ ,  $44.7 \pm 5.1$  and  $44.6 \pm 8.6\ \mu mol\ mol^{-1}$  for K1, K2, K3 and K4 treatments, respectively). Changes in  $\Gamma^*$  derived using the method of Laisk (1977) have been frequently observed under stress conditions such as drought (Galmés et al. 2007); therefore, we re-calculated  $g_m$  using the non-stressed  $\Gamma^*$  values ( $44.6\ \mu mol\ mol^{-1}$ ), which is a reasonable assumption as  $\Gamma^*$  is an intrinsic property of Rubisco and thus varies only by a small amount within a species under different growing conditions. The  $CO_2$  concentration in the chloroplast stroma ( $C_c$ ) was calculated using the equation

$$C_c = C_i - A / g_m \quad (5)$$

# ***Quantitative limitation analyses***

The limitations (stomatal limitation,  $S_L$ ; the mesophyll conductance limitation,  $MC_L$ ; and the biochemical limitation,  $B_L$ ) imposed by K deficiency on A were investigated following Grassi and Magnani (2010). Because the fluorescence derived linear electron transport rate ( $J$ ) is tightly coupled with the maximum rate of Rubisco-catalysed carboxylation ( $V_{c,max}$ ) (Galmés et al. 2007; Gallé et al. 2009), a minor modification was adopted when calculating  $B_L$  using  $J$  instead of  $V_{c,max}$  (Gallé et al. 2009). Relative changes in light-saturated assimilation are expressed in terms of relative changes in stomatal, mesophyll conductance and biochemical capacity as showed in Eqn 6:

$$dA/A = S_L + MC_L + B_L = l_s \cdot dg_{sc}/g_{sc} + l_{mc} \cdot dg_m/g_m + l_b \cdot dJ/J \quad (6)$$

where  $l_s$ ,  $l_{mc}$  and  $l_b$  are the corresponding relative limitations calculated as Eqns 7–9 and  $g_{sc}$  is stomatal conductance to  $CO_2$  (gs/1.6).

$$l_s = (g_{tot}/g_{sc} \cdot \partial A / \partial C_c) / (g_{tot} + \partial A / \partial C_c) \quad (7)$$

$$l_m = (g_{tot}/g_m \cdot \partial A / \partial C_c) / (g_{tot} + \partial A / \partial C_c) \quad (8)$$

$$l_b = g_{tot} / (g_{tot} + \partial A / \partial C_c) \quad (9)$$

Where the  $g_{tot}$  is the total conductance to  $CO_2$  from the leaf surface to carboxylation sites determined in Eqn 10.  $\partial A / \partial C_c$  was calculated as the slope of  $A/C_c$  response curves over a  $C_c$  range of 50–100  $\mu\text{mol mol}^{-1}$  (Tomás et al. 2012).

$$g_{tot} = 1 / (1/g_{sc} + 1/g_m) \quad (10)$$

Then, the relative change of A,  $g_{sc}$ ,  $g_m$  and  $J$  in Eqn 6 can be approximated by the following (Chen et al. 2013):

$$dA \approx (A_{max}^{ref} - A) / A_{max}^{ref} \quad (11)$$

$$dg_{sc}/g_{sc} \approx (g_{sc}^{ref} - g_{sc}) / g_{sc}^{ref} \quad (12)$$

$$dg_m/g_m \approx (g_m^{ref} - g_m) / g_m^{ref} \quad (13)$$

$$dJ/J \approx (J_{max}^{ref} - J) / J_{max}^{ref} \quad (14)$$

where  $A_{max}^{ref}$ ,  $g_{sc}^{ref}$ ,  $g_m^{ref}$  and  $J_{max}^{ref}$  are the reference values. Reference maximum values of net  $CO_2$  assimilation rate, stomatal and mesophyll conductance and the rate of electron transport were obtained in +K treatments; therefore, its parameters were defined as standard.

## Statistical analysis

Descriptive statistical analyses were used for the obtained parameters to assess the range of variability and standard error (SE). All data were subjected to a two-way analysis of variance

181 (ANOVA) with SPSS 18.0 software (SPSS, Chicago, IL, USA). The difference between mean  
182 values was compared using Duncan's multiple range test at  $P < 0.05$ . Graphics and regression  
183 analysis were performed using the GraphPad Prism 7.0 software (GraphPad, San Diego, CA).

## 184 **Results**

185 The leaf potassium (K) concentration (%), net CO<sub>2</sub> assimilation rate ( $A_N$ ) and chloroplastic  
186 CO<sub>2</sub> concentrations ( $C_C$ ) of daily potassium supplied plants (control) remained mostly unchanged  
187 throughout the experiment (Fig. 1a,b,d,e), but, slightly different between species, Pecan had a little  
188 larger K and  $C_C$  but lower  $A_N$  compared with Hickory. After withholding potassium from plants,  
189 K and  $A_N$  decreased progressively in two treatment (K0 and K2), reaching minimum values of 0.5%  
190 and  $< 5 \mu\text{mol CO}_2 \text{ m}^{-2} \text{ s}^{-1}$ , respectively, while  $C_C$  increased in both two cultivars, with similar  
191 trends during severe potassium stress (Fig. 3). Compare with K0 treatment, K,  $A_N$  and  $C_C$  of K2  
192 recovered more quickly and closer to K5 (control, daily potassium supplied) throughout the  
193 recovery period of potassium supply. K,  $A_N$  of K2 rose 41.24% and 26.98% after restoring  
194 potassium supply 7 days after in Pecan, which were significantly larger than those (18.92% and  
195 16.16%) in Hickory.

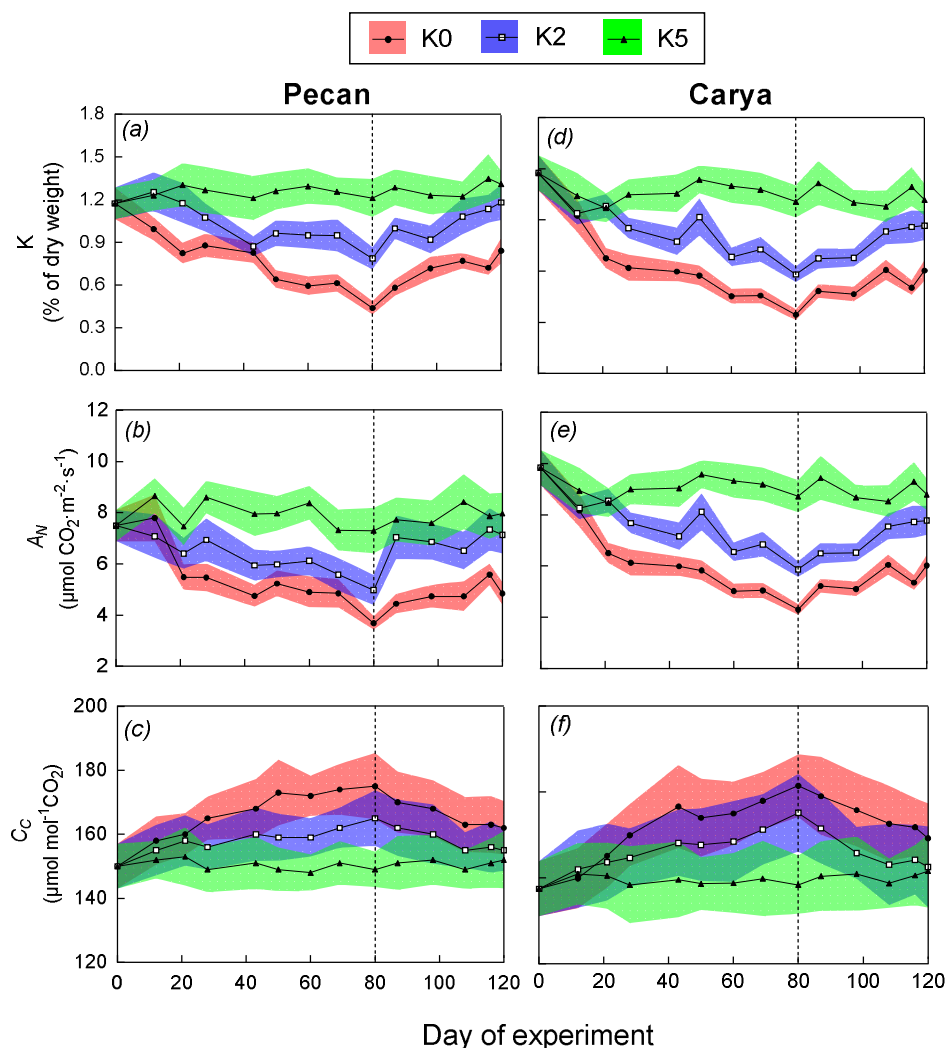

Fig.1. Leaf potassium percentage (%) of dry weight (K), net CO<sub>2</sub> assimilation rate (A<sub>N</sub>), chloroplastic CO<sub>2</sub> concentrations (C<sub>C</sub>) of Pecan and Hickory as affected by different K levels during seedling stage. The vertical dashed lines indicate the beginning of the beginning of recovering potassium supply. Data points represent means and standard errors of at least four replicates. The width of green, purple and red ribbons is the standard deviation.

After withholding potassium from plants, Mesophyll conductance for CO<sub>2</sub> (g<sub>m</sub>), stomatal conductance for CO<sub>2</sub> (g<sub>s</sub>), electron transport rate (J) and maximum velocity of carboxylation (V<sub>c,max</sub>) decreased progressively in all treatments of Pecan and Hickory, reaching minimum values of 0.0265 mol CO<sub>2</sub>·m<sup>-2</sup>·s<sup>-1</sup>, 0.0457 mol·m<sup>-2</sup>·s<sup>-1</sup>, 99.94 μmol e<sup>-1</sup>·m<sup>-2</sup>·s<sup>-1</sup> and 47.5904 μmol CO<sub>2</sub>·m<sup>-2</sup>·s<sup>-1</sup> after severe potassium stress for 80d, respectively. After recovering potassium supply, the large restoration of g<sub>m</sub>, g<sub>s</sub>, J and V<sub>c,max</sub> were observed in the K0 and K2 treatments in two cultivations. The g<sub>m</sub> of K0 and K2 recovered 55.16% and 71.54% to control values (0.09684 mol CO<sub>2</sub>·m<sup>-2</sup>·s<sup>-1</sup>) of Pecan (Fig. 2a), respectively; g<sub>m</sub> of K0 and K2 recovered 55.65% and 81.93% to control values



211 (0.09938 mol CO<sub>2</sub>·m<sup>-2</sup>·s<sup>-1</sup>) of Hickory (Fig. 2b), respectively; gs recovered 76.80% and 90.64% to  
 212 control values (0.1082 mol·m<sup>-2</sup>·s<sup>-1</sup>) of Hickory (Fig. 2f) respectively, which were nearly 10  
 213 percentage points more than of Pecan. The restoration of *J* and *V<sub>c,max</sub>* under both K0 and K2  
 214 treatments were reached to control values after recovering potassium supply for 40d (Fig. 2c, d, g  
 215 h), respectively. However, slightly different levels of recovery time of *g<sub>m</sub>*, *g<sub>s</sub>* and *V<sub>c,max</sub>* were  
 216 observed in K2 treatments, with the three photosynthetic parameters show faster recovery speed  
 217 after recovering potassium supply. Under K5 treatment, *g<sub>m</sub>*, *g<sub>s</sub>*, *J* and *V<sub>c,max</sub>* of Pecan and Hickory  
 218 almost unaltered throughout the experiment, while those photosynthetic parameters of Hickory  
 219 were slightly larger than Pecan.

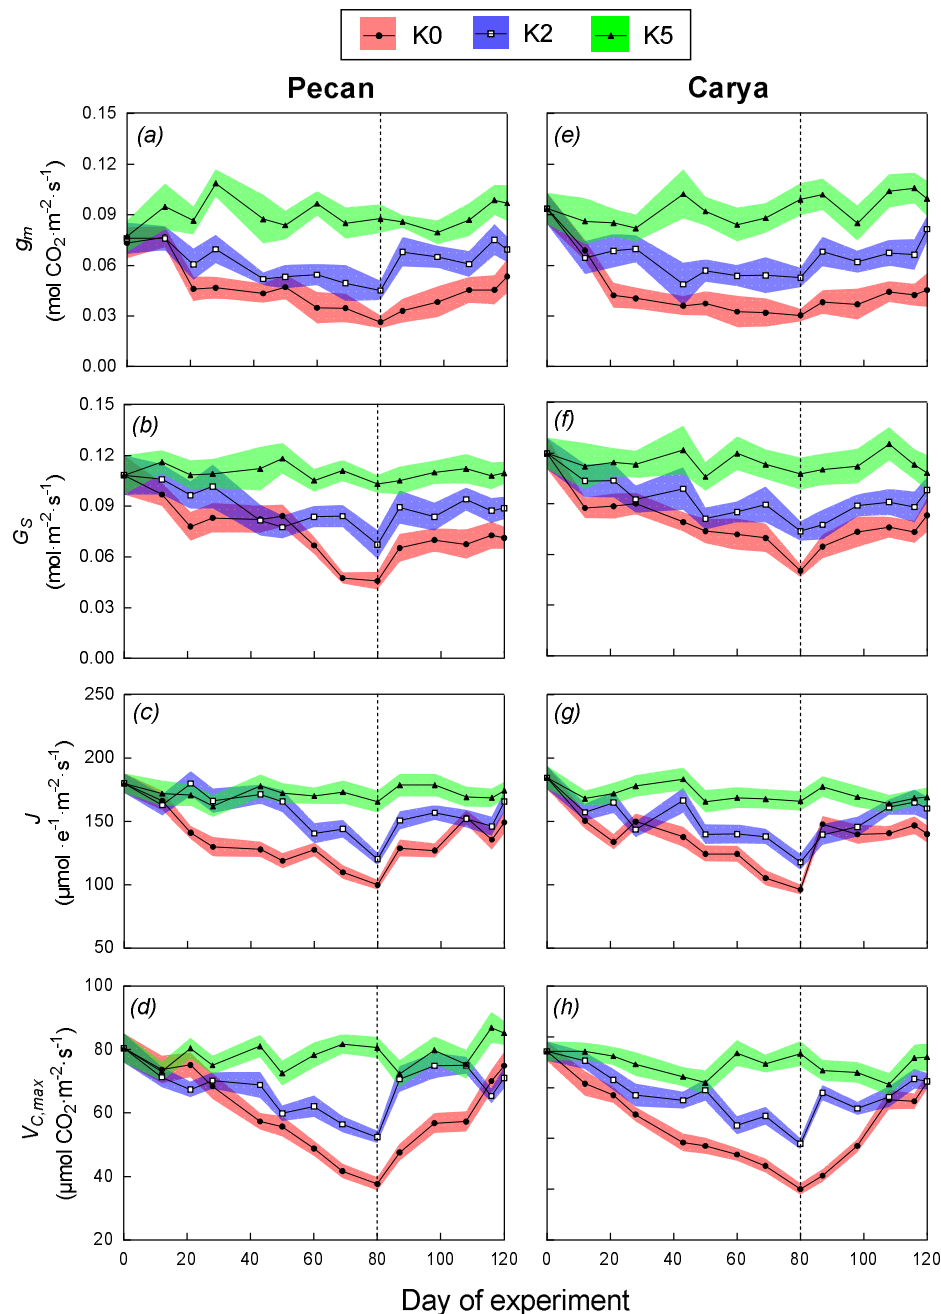

Fig.2. Mesophyll conductance for  $\text{CO}_2$  ( $g_m$ ), stomatal conductance for  $\text{CO}_2$  ( $g_s$ ), electron transport rate ( $J$ ) and maximum velocity of carboxylation ( $V_{c,\max}$ ) of Pecan and Hickory as affected by different K levels during seedling stage. The vertical dashed lines indicate the beginning of recovering potassium supply. Data points represent means and standard errors of at least four replicates. The width of green, purple and red ribbons is the standard deviation.

229 When plotting all K content (consisting all of K5, K2 and K0 under potassium stress and  
230 recover, respectively) against the corresponding calculated  $A_N$ ,  $J$ ,  $g_s$  and  $g_m$ , highly significant  
231 positive correlation relationships were obtained pooling potassium supply and potassium stress  
232 data together, although two different functions were derived for the Pecan and Hickory (Fig. 3a-d).  
233 In these four figures, slightly steep slope was determined for the Pecan data set, however, less  
234 clear difference was observed between two cultivars. Moreover, K content on  $A_N$ ,  $J$ ,  $g_s$  and  $g_m$   
235 values resulted in almost similar slopes of linear regression for both two cultivars, respectively.

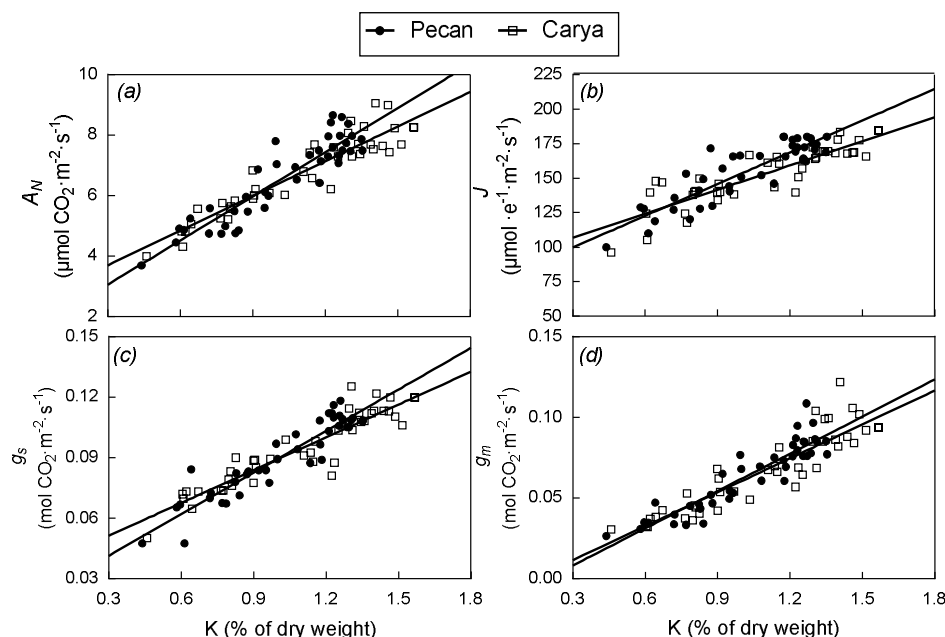

236  
237 Fig.3. The relationships between leaf potassium percentage(%) of dry weight (K) and net CO<sub>2</sub>  
238 assimilation rate ( $A_N$ ), electron transport rates ( $J$ ), stomatal conductance for CO<sub>2</sub> ( $g_s$ ) and  
239 mesophyll conductance for CO<sub>2</sub> ( $g_m$ ) derived from data of the whole experimental periods. Circles  
240 and diamonds denote Pecan and Hickory data, respectively. Data points represent means and  
241 standard errors of at least four replicates.

242  
243 The  $A_N$  correlated negatively with chloroplastic CO<sub>2</sub> concentrations ( $C_C$ ), while,  $A_N$  in  
244 Hickory was slightly higher Pecan. When plotting all  $A_N$  (consisting all of K5, K2 and K0 under  
245 potassium stress and recover potassium, respectively) against the corresponding calculated  $J$  and  
246  $g_m$ , highly significant positive correlation relationships were obtained pooling potassium supply  
247 and potassium stress data together, although two different functions were derived for the Pecan  
248 and Hickory (Fig. 4b,c). In addition,  $A_N$  on  $J$  and  $g_m$  values resulted in almost similar slopes of  
249 linear regression for both two cultivars, respectively.

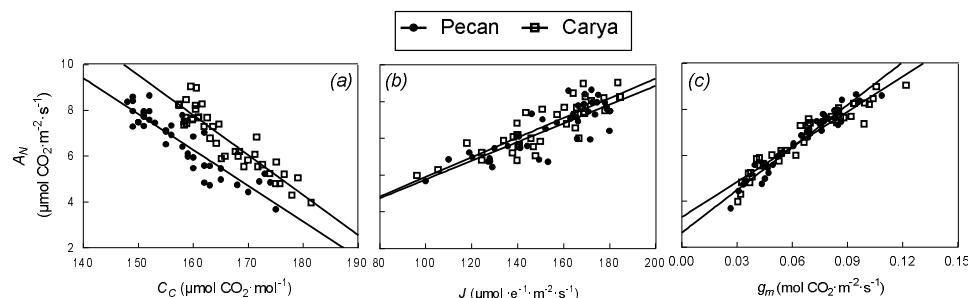

Fig.4. The relationships between leaf potassium percentage (%) of dry weight (K) and net CO<sub>2</sub> assimilation rate ( $A_N$ ), electron transport rates ( $J$ ), stomatal conductance for CO<sub>2</sub> ( $g_s$ ) and mesophyll conductance for CO<sub>2</sub> ( $g_m$ ) derived from data of the whole experimental periods. Circles and diamonds denote Pecan and Hickory data, respectively. Data points represent means and standard errors of at least four replicates.

When analyzing the effects of potassium on photosynthesis different indicators of stress intensity can be used. In order to enhance the comparability of our data with other experiment, we, therefore expressed relative limitations in terms of both of both K (% of dry weight) (Fig. 5) and day of experiment (Fig. 6). what the stress index adopted, small differences between Pecan and Hickory. With increasing potassium stress intensity  $MC_L$ ,  $B_L$  and  $S_L$  increased significantly, and, the increase rate of  $MC_L$  is greater than that of  $B_L$  and  $S_L$ . At mild-to-moderate potassium stress levels (corresponding to values of K >0.9% of dry weight), about half of the decline in  $A_N$  was attributable to mesophyll resistance.

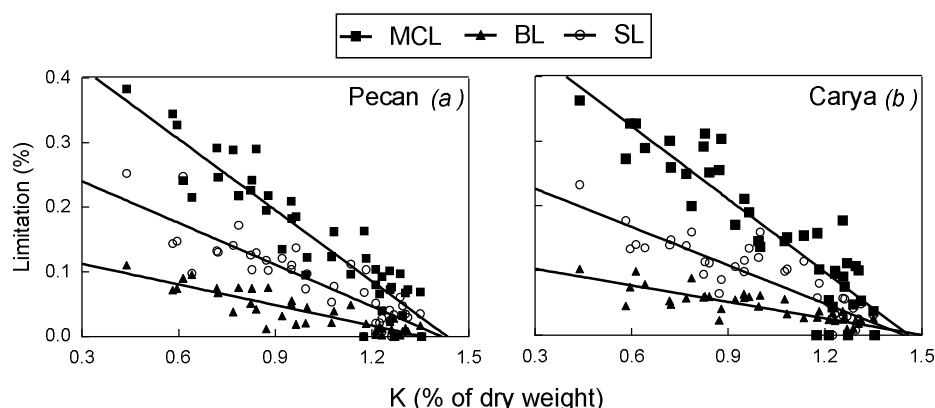

Fig.5. The relationships between photosynthetic limitations and leaf potassium percentage (%) of dry weight (K) of Pecan (a) and Hickory (b).  $S_L$ ,  $MC_L$ ,  $B_L$  denote stomatal, mesophyll conductance and biochemical limitation respectively. Each point in the same shape represents a calculation (42 values were calculated for each limitation)

Quantitative limitation analysis of photosynthesis underlined the above-described changes during potassium stress and recovery after subsequent recover potassium. In all three experiments,

MC<sub>L</sub> play a major role of the total limitation under severe potassium stress. In K0 and K2 treatments, MC<sub>L</sub> made up >40% and >50% of the total limitation under severe potassium stress in Pecan and Hickory, while S<sub>L</sub> accounted for only up to 20%. Furthermore, B<sub>L</sub> did not exceed 10% of the total limitation. As already observed for the A<sub>N</sub>, g<sub>s</sub>, and g<sub>m</sub> data during stress and recovery, almost no limitation of S<sub>L</sub> and B<sub>L</sub> during potassium stress and after recover potassium (Fig. 6c,f). Limitation of photosynthetic recovery of the K0 and K2 plants was mainly driven by a still high MC<sub>L</sub> and somewhat lower S<sub>L</sub> and B<sub>L</sub> (Fig. 5a, b, d, e). The delayed recovery of photosynthesis in the K0 plants was mainly due to a maintained high proportion of MCL and SL (Fig. 5d) during several days of recover potassium (Fig. 6a, d), while SL contributed only partially to the total limitation in the initial phase of re-watering. The recovery of photosynthesis in the K2 plants is due to a rapidly decreasing MCL during the recover potassium period, while SL is nearly equaled MCL in the later phase of recover potassium (Fig. 6b, e).

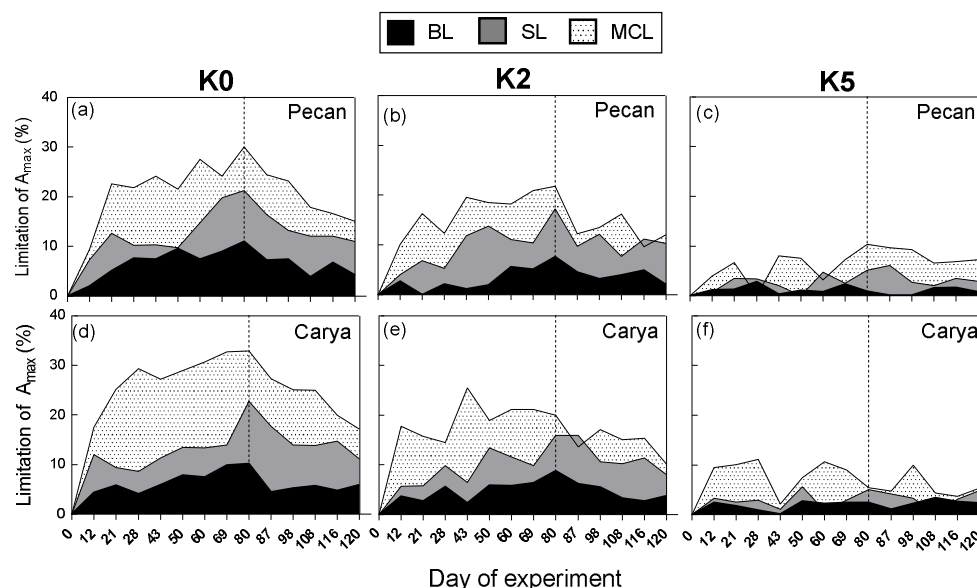

Fig.6. Quantitative limitation analysis of photosynthetic CO<sub>2</sub> assimilation during potassium stress and subsequently recovering. The shaded areas represent the percentage of stomatal (SL), mesophyll (M<sub>L</sub>), and biochemical (B<sub>L</sub>) limitation based on control values of A<sub>N</sub>, g<sub>s</sub>, g<sub>m</sub>, and V<sub>c,max</sub> and J. Calculations were done with mean values of at least five measurements per treatment and day. The vertical dashed lines indicate the beginning of the beginning of recovering potassium supply. Data points represent means and standard errors of at least four replicates.

## Discussion

In the present study, the same experimental design was applied to Brassica napus under four different potassium treatments, followed by a potassium stress period and a recover after recover potassium. The most important difference between the four potassium treatments was observed: the rate of photosynthetic recovery was the slowest under K0 treatment and the quickest under K2

296 treatment of Pecan. Then, extremely low photosynthetic limitation in plant leaves of Pecan and  
297 Hickory under K5 treatment. A positive relationship between K supply and  $A_N$  had reported in  
298 numerous previous studies. However, photosynthesis rates may not have changed as a response to  
299 K treatment due to relatively higher leaf K concentration, which were far more than the values  
300 (1.04% and 1.28 % of dry weight) proposed by Gierth (2007) and Zhifeng Lu (2016) respectively,  
301 as are the values (1.4 % and 1.42%) in this study.

302 Withholding potassium resulted in a closure of stomata, which was accompanied by a marked  
303 decrease of net photosynthesis ( $A_N$ ) in K0 and K2 treatment of Pecan and Hickory (Fig. 2).  
304 Throughout periods of potassium stress imposition, stomatal conductance ( $g_s$ ) and  $A_N$  followed  
305 the same course, indicating a strong correlation between them, which has been shown elsewhere  
306 (Medrano et al., 2002). Moreover, plants under K5 treatment displayed an inequable course for  
307 stomatal conductance ( $g_s$ ) of Pecan and Hickory. In addition, mesophyll conductance ( $g_m$ ) showed  
308 a similar trend with stomatal conductance ( $g_s$ ) under all three potassium supply in Pecan and  
309 Hickory. These results are in line with previous studies, where a decrease of  $g_m$  has been observed  
310 during potassium stress (Song et al., 2011; Lu et al., 2016; Wang et al., 2012; Battie-Laclau et al.,  
311 2014). The rapid restoration of  $J$  and  $V_{cmax}$  to control values during prolonged recover potassium,  
312 while the restoration of  $g_s$  and  $g_m$  could not reach the level of the control value, especially under  
313 K0 stress of Pecan and Hickory. These results are indicating restored  $J$  and  $V_{cmax}$  during prolonged  
314 recover potassium presumably facilitated photosynthetic recovery after the beginning of  
315 re-watering, because  $A_N$  and  $J$ ,  $V_{cmax}$  were immediately restored to control values within the initial  
316 phase.

317 Lots of previous studies have shown total photosynthetic dramatically decreased with  
318 decreasing K supply. (Bednars et al. 1998; Jin et al. 2011; Wang et al. 2012; Battie-laclau et  
319 al. 2014; Erel et al. 2015). And the results of quantitative analysis revealed that the three  
320 components contributing to total photosynthetic limitation, namely,  $S_L$ ,  $MC_L$ , and  $B_L$  varied at  
321 varying K concentrations. The decline of  $P_n$  with the decrease of potassium concentration in  
322 leaves, while all of  $S_L$ ,  $B_L$  and  $MC_L$  were decreased,  $B_L$  was markedly lower and  $MC_L$  was higher,  
323 especially at lower treatment in both cultivars (Fig. 6). This can be attributed to prioritization of  
324 allocation of excess K to the cytosol for metabolic activity rather than to reduce the transmission  
325 resistance of  $CO_2$  in the chloroplast. (Reich et al., 1997; Pettigrew 1999; Zhao et al., 2001;  
326 Battie-Laclau et al., 2013; Tomás et al., 2016). Then our quantitative limitation analysis showed  
327 that  $S_L$  was always higher than  $B_L$  under three treatments in both species. This pattern of response  
328 is consistent with that decreed by other authors (Tanaka et al., 2005; Christian et al., 2014; Peiter et  
329 al., 2011). Although several studies have reported that stomatal closure ( $S_L$ ) plays by far the main

role in the decline of photosynthesis, even at rather severe levels of potassium stress (Bednarsz 1998; shavala ,2003; Lebaudy ,208; Andrés, 2014), but our study draw different conclusions that  $MC_L$  is the dominant factor in the AN reduction rather than the  $S_L$  in both species. This striking discrepancy is explained by the fact that potassium stress increases the transmission distance of  $CO_2$  in the chloroplast (Zhao et al., 2001; Battie-Laclau et al., 2014 ).

An even clear picture of the potassium effects emerges when the different limitations are plotted against potassium stress and subsequent recovering (Fig. 6). In both species, all the limitations increased with increasing potassium stress and duration of treatment, but their relative contribution changed. Moreover, in the early stage of potassium treatment (0-21d), all the three limitations under  $K_0$  and  $K_2$  rapidly risen. In the middle and late period (21-80d), all the limitations maintained their high level and changed little under  $K_0$  treatment, this could be the acclimation of plants to severe potassium deficiency, a similar situation had been appeared in the plant drought test (Galle et al., 2009). After recover potassium, obvious decline could be observed of all the three limitations under  $K_0$  and  $K_2$  treatment in both species. However,  $S_L$  and  $MC_L$  were not hopely recovered to the control level ( $K_5$ ), they remain at a high level until the end of the experiment. The most likely explanation for this discrepancy might be derived from the effect of potassium stress on the irreversible structural effects of plant leaves. In this sense, potassium deficiency induced the increase of with leaf dry mass per area (MA)(Reich et al., 1997; Pettigrew, 1999; Zhao et al., 2001; Song et al., 2011), reducing the leaves thickness and the volume of cell gap in the leaves, thus reducing the gas conduction ability of  $CO_2$  (Battie-Laclau et al., 2014).

In conclusion,  $A_N$  of Pecan and Craya plants declined by increasing  $S_L$ ,  $MC_L$ , and  $B_L$  under prolonged severe potassium stress. Pecan, needed K (1.4% of dry weight less than that of Hickory) to avoid the decline of  $A_N$ . All of  $S_L$ ,  $MC_L$ , and  $B_L$  had a sharp decline under  $K_0$  and  $K_5$  treatment in both species. In summary, the present study strongly reinforces the important role of  $g_s$ ,  $g_m$ ,  $J$  and  $V_{c,max}$  during recovery from potassium stress induced inhibition of photosynthesis, and shows for the first time that such a role depends on the Long-term processing.

## References

- Amtmann, A., Troufflard, S., & Armengaud, P. (2010). The effect of potassium nutrition on pest and disease resistance in plants. *Physiologia Plantarum*, 133(4), 682-691.
- Andrés, Z., Pérez-Hormaeche, J., Leidi, E. O., Schlücking, K., Steinhorst, L., & Mclachlan, D. H., et al. (2014). Control of vacuolar dynamics and regulation of stomatal aperture by tonoplast potassium uptake. *Proceedings of the National Academy of Sciences of the United States of America*, 111(17), 1806-14.
- Araya, T., Noguchi, K., & Terashima, I. (2006). Effects of carbohydrate accumulation on photosynthesis differ between sink and source leaves of *Phaseolus vulgaris* L. *Plant & Cell Physiology*, 47(5), 644-52.

366 Basile, B., Reidel, E. J., Weinbaum, S. A., & Dejong, T. M. (2003). Leaf potassium concentration,  
367 co<sub>2</sub> exchange and light interception in almond trees ( *Prunus dulcis*, (mill) d.a. webb).  
368 *Scientia Horticulturae*, 98(2), 185-194.

369 Battie-Laclau, P., Laclau, J., Domec, J., Christina, M., Bouillet, J., & Cassia Piccolo, M., et al.  
370 (2014). Effects of potassium and sodium supply on drought-adaptive mechanisms in  
371 eucalyptus grandis plantations. *New Phytologist*, 203(2), 401-413.

372 Battie-Laclau, P., Laclau, J., Beri, C., Mietton, L., Muniz, M. R. A., & Arenque, B. C., et al.  
373 (2013). Photosynthetic and anatomical responses of eucalyptus grandis leaves to potassium  
374 and sodium supply in a field experiment. *Plant Cell & Environment*, 37(1), 70-81.

375 Bednarz, C. W., Oosterhuis, D. M., & Evans, R. D. (1998). Leaf photosynthesis and carbon  
376 isotope discrimination of cotton in response to potassium deficiency. *Environmental &*  
377 *Experimental Botany*, 39(2), 131-139.

378 Berg, W. K., Cunningham, S. M., Brouder, S. M., Joern, B. C., Johnson, K. D., & Volenec, J. J.  
379 (2010). Influence of phosphorus and potassium on alfalfa yield, taproot C and N pools, and  
380 transcript levels of key genes after defoliation. *Crop Science*, 49(3), 974-982.

381 Blevins, D. G. (1985). Role of potassium in protein metabolism in plants.

382 Bernacchi, C. J., Singaas, E. L., Pimentel, C., Jr, A. R. P., & Long, S. P. (2010). Improved  
383 temperature response functions for models of rubisco-limited photosynthesis. *Plant Cell &*  
384 *Environment*, 24(2), 253-259.

385 Bilger, W., & Björkman, O. (1994). Relationships among violaxanthin deepoxidation, thylakoid  
386 membrane conformation, and nonphotochemical chlorophyll fluorescence quenching in  
387 leaves of cotton ( *Gossypium hirsutum*, L.). *Planta*, 193(2), 238-246.

388 Cakmak, I. (2005). Role of potassium in alleviating the detrimental effects of abiotic stress plants.  
389 J. plant nutr soil sci. *Journal of Plant Nutrition & Soil Science*, 168(4), 521-530.

390 Chen, T. W., Henke, M., Kahlen, K., Visser, P. H. B. D., Buck-Sorlin, G., & Wiechers, D., et al.  
391 (2013). Revealing the relative importance of photosynthetic limitations in cucumber canopy.  
392 *Fspm*.

393 Christian Zörb, Mehmet Senbayram, & Edgar Peiter. (2014). Potassium in agriculture – status and  
394 perspectives ☆. *Journal of Plant Physiology*, 171(9), 656-669.

395 Cong, R., Li, H., Zhang, Z., Ren, T., Li, X., & Lu, J. (2016). Evaluate regional potassium  
396 fertilization strategy of winter oilseed rape under intensive cropping systems: large-scale field  
397 experiment analysis. *Field Crops Research*, 193, 34-42.

398 Erel, R., Yermiyahu, U., Ben-Gal, A., Dag, A., Shapira, O., & Schwartz, A. (2015). Modification  
399 of non-stomatal limitation and photoprotection due to K and Na nutrition of olive trees.  
400 *Journal of Plant Physiology*, 177, 1-10.

401 Flexas, J., & Diaz-Espejo, A. (2015). Interspecific differences in temperature response of  
402 mesophyll conductance: food for thought on its origin and regulation. *Plant, cell &*  
403 *environment*, 38(4), 625-8.

404 Flexas, J., Barbour, M. M., Brendel, O., Cabrera, H. M., Carriqui, M., & Díaz-Espejo, A., et al.



(2012). Mesophyll diffusion conductance to  $CO_2$ : an unappreciated central player in photosynthesis. *Plant Science An International Journal of Experimental Plant Biology*, 193–194(1), 70-84.

Flexas, J., Díaspejo, A., Berry, J. A., Cifre, J., Galmés, J., & Kaldenhoff, R., et al. (2007). Analysis of leakage in irga's leaf chambers of open gas exchange systems: quantification and its effects in photosynthesis parameterization. *Journal of Experimental Botany*, 58(6), 1533.

Galle, A., & Flexas, J. (2009). The role of mesophyll conductance during water stress and recovery in tobacco (*nicotiana sylvestris*): acclimation or limitation?. *Journal of Experimental Botany*, 60(8), 2379-2390.

Galmes, J., & Medrano, H. J. (2007). Photosynthetic limitations in response to water stress and recovery in mediterranean plants with different growth forms. *New Phytologist*, 175(1), 81-93.

Genty, B., Briantais, J. M., & Baker, N. R. (1989). The relationship between the quantum yield of photosynthetic electron transport and quenching of chlorophyll fluorescence. *BBA - General Subjects*, 990(1), 87-92.

Gierth, M., & Mäser, P. (2007). Potassium transporters in plants – involvement in  $K^+$  acquisition, redistribution and homeostasis. *Febs Letters*, 581(12), 2348-2356.

Grassi, G., & Magnani, F. (2010). Stomatal, mesophyll conductance and biochemical limitations to photosynthesis as affected by drought and leaf ontogeny in ash and oak trees. *Plant Cell & Environment*, 28(7), 834-849.

Harley, P. C., Loreto, F., Di, M. G., & Sharkey, T. D. (1992). Theoretical considerations when estimating the mesophyll conductance to  $CO_2$  flux by analysis of the response of photosynthesis to  $CO_2$ . *Plant Physiology*, 98(4), 1429-1436.

Hsiao, T. C., & Läuchli, A. (1986). Role of potassium in plant-water relations. *Advances in Plant Nutrition*.

Hu, W., Yang, J., Meng, Y., Wang, Y., Chen, B., & Zhao, W., et al. (2015). Potassium application affects carbohydrate metabolism in the leaf subtending the cotton (*Gossypium hirsutum*, L.) boll and its relationship with boll biomass. *Field Crops Research*, 179, 120-131.

Jordan-Meille, L., & Pellerin, S. (2008). Shoot and root growth of hydroponic maize (*Zea mays* L.) as influenced by  $K$  deficiency. *Plant & Soil*, 304(1-2), 157-168.

Lai, A. Kh. (Agu Kheifovich). (1977). Kinetics of photosynthesis and photorespiration of  $C_3$  in plants. *Mccarthy*.

Lebaudy, A., Vavasseur, A., Hosy, E., Dreyer, I., Leonhardt, N., & Thibaud, J. B., et al. (2008). Plant adaptation to fluctuating environment and biomass production are strongly dependent on guard cell potassium channels. *Proceedings of the National Academy of Sciences of the United States of America*, 105(13), 5271-5276.

Li, X., Chunsheng, M. U., Lin, J., Wang, Y., & XiuJun, L. I. (2014). Effect of alkaline potassium and sodium salts on growth, photosynthesis, ions absorption and solutes synthesis of wheat seedlings. *Experimental Agriculture*, 50(1), 144-157.

Lu, Z., Lu, J., Pan, Y., Lu, P., Li, X., & Cong, R., et al. (2016). Anatomical variation of mesophyll conductance under potassium deficiency has a vital role in determining leaf photosynthesis. *Plant Cell & Environment*, 39(11), 2428-2439.

Lu Z, Ren T, Pan Y, Li X, Cong R, & Lu J. (2016). Differences on photosynthetic limitations between leaf margins and leaf centers under potassium deficiency for *Brassica napus* L.

449 *Scientific Reports*, 6, 21725.

450 Maathuis, F. J., Ichida, A. M., Sanders, D., & Schroeder, J. I. (1997). Roles of higher plant  $k^+$

451 channels. *Plant Physiology*, 114(4), 1141-1149.

452 Medrano, H., Escalona, J. M., Bota, J., Gulías, J., & Flexas, J. (2002). Regulation of

453 photosynthesis of c3 plants in response to progressive drought: stomatal conductance as a

454 reference parameter. *Annals of Botany*, 89(7), 895-905.

455 Oosterhuis, D. M., Loka, D. A., Kawakami, E. M., & Pettigrew, W. T. (2014). The physiology of

456 potassium in crop production. *Advances in Agronomy*, 126, 203-233.

457 Paul, M. J., & Pellny, T. K. (2003). Carbon metabolite feedback regulation of leaf photosynthesis

458 and development. *Journal of Experimental Botany*, 54(382), 539-547.

459 Peiter, E. (2011). The plant vacuole: emitter and receiver of calcium signals. *Cell Calcium*, 50(2),

460 120-128.

461 Perezmartin, A., Flexas, J., Ribascarbó, M., Bota, J., Tomás, M., & Infante, J. M., et al. (2009).

462 Interactive effects of soil water deficit and air vapour pressure deficit on mesophyll

463 conductance to  $co_2$  in vitis vinifera and olea europaea. *Journal of Experimental Botany*, 60(8),

464 2391.

465 Pettigrew, W. T. (1999). Potassium deficiency increases specific leaf weights and leaf glucose

466 levels in field-grown cotton. *Agronomy Journal*, 91(6), 962-968.

467 Pettigrew, W. T. (2010). Potassium influences on yield and quality production for maize, wheat,

468 soybean and cotton. *Physiologia Plantarum*, 133(4), 670-681.

469 Quentin, A. G., Close, D. C., Hennen, L. M. H. P., & Pinkard, E. A. (2013). Down-regulation of

470 photosynthesis following girdling, but contrasting effects on fruit set and retention, in two

471 sweet cherry cultivars. *Plant Physiology & Biochemistry Ppb*, 73(73C), 359-367.

472 Reich, P. B., Walters, M. B., & Ellsworth, D. S. (1997). From tropics to tundra: global

473 convergence in plant  $\square$  functioning. *Proceedings of the National Academy of Sciences of the*

474 *United States of America*, 94(25), 13730-13734.

475 Sagardoy, R., Vázquez, S., Florezsarasa, I. D., Albacete, A., Ribascarbó, M., & Flexas, J., et al.

476 (2010). Stomatal and mesophyll conductances to  $co_2$  are the main limitations to

477 photosynthesis in sugar beet (beta vulgaris) plants grown with excess zinc. *New Phytologist*,

478 187(1), 145-158.

479 Severtson, D., Callow, N., Flower, K., Neuhaus, A., Olejnik, M., & Nansen, C. (2016). Unmanned

480 aerial vehicle canopy reflectance data detects potassium deficiency and green peach aphid

481 susceptibility in canola. *Precision Agriculture*, 17(6), 1-19.

482 Shabala, S. (2003). Regulation of potassium transport in leaves: from molecular to tissue level.

483 *Annals of Botany*, 92(5), 627-634.

484 Shen, C., Wang, J., Jin, X., Liu, N., Fan, X., & Dong, C., et al. (2017). Potassium enhances the

485 sugar assimilation in leaves and fruit by regulating the expression of key genes involved in

486 sugar metabolism of asian pears. *Plant Growth Regulation*(1), 1-14.

487 Shi JJ, Ye SY, Yu SQ, Wang ZJ (2013). Genetic diversity SSR analysis of 37 newly introduced

488 hickory hickory varieties. *Journal of Anhui Agricultural University*. 40(1):42-6.

489 Song, H. J., Jian, Q. H., Xue, Q. L., Bing, S. Z., Jia, S. W., & Zheng, J. W., et al. (2011). Effects of

490 potassium supply on limitations of photosynthesis by mesophyll diffusion conductance in

491 carya cathayensis. *Tree Physiology*, 31(10), 1142.

492 Song, Q., Zhang, G., & Zhu, X. G. (2013). Optimal crop canopy architecture to maximise canopy

493 photosynthetic co<sub>2</sub> uptake under elevated co<sub>2</sub> – a theoretical study using a mechanistic model  
 494 of canopy photosynthesis. *Functional Plant Biology Fpb*, 40(2), 109-124.

495 Sousa, J. V. D., Rodrigues, C. R., Luz, J. M. Q., Carvalho, P. C. D., Rodrigues, T. M., & Brito, C.  
 496 H. D. (2010). Foliar application of the potassium silicate in corn: photosynthesis, growth and  
 497 yield. *Bioscience Journal*, 26(4), 502-513.

498 Tanaka, Y., Sano, T., Tamaoki, M., Nakajima, N., Kondo, N., & Hasezawa, S. (2005). Ethylene  
 499 inhibits abscisic acid-induced stomatal closure in arabidopsis thaliana. *Plant Physiology*,  
 500 138(4), 2337-2343.

501 Tester, M., & Leigh, R. A. (2001). Partitioning of nutrient transport processes in roots. *Journal of*  
 502 *Experimental Botany*, 52(356), 653-653.

503 Tosens, T., Ülo Niinemets, Westoby, M., & Wright, I. J. (2012). Anatomical basis of variation in  
 504 mesophyll resistance in eastern australian sclerophylls: news of a long and winding path.  
 505 *Journal of Experimental Botany*, 63(14), 5105-5119.

506 Tosens, T., Nishida, K., Gago, J., Coopman, R. E., Cabrera, H. M., & Carriqui, M., et al. (2016).  
 507 The photosynthetic capacity in 35 ferns and fern allies: mesophyll co<sub>2</sub> diffusion as a key trait.  
 508 *New Phytologist*, 209(4), 1576-1590.

509 Valentini, R., Epron, D., Angelis, P. D., Matteucci, G., & Dreyer, E. (2010). In situ estimation of  
 510 net co<sub>2</sub> assimilation, photosynthetic electron flow and photorespiration in turkey oak (q.  
 511 cerris l.) leaves: diurnal cycles under different levels of water supply. *Plant Cell &*  
 512 *Environment*, 18(6), 631-640.

513 Vislap, V. (2012). Developmental changes in mesophyll diffusion conductance and photosynthetic  
 514 capacity under different light and water availabilities in populus tremula: how structure  
 515 constrains function. *Plant Cell & Environment*, 35(5), 839-856.

516 Wang, M., Zheng, Q., Shen, Q., & Guo, S. (2013). The critical role of potassium in plant stress  
 517 response. *International Journal of Molecular Sciences*, 14(4), 7370-7390.

518 Wang, N., Hua, H., Eneji, A. E., Li, Z., Duan, L., & Tian, X. (2012). Genotypic variations in  
 519 photosynthetic and physiological adjustment to potassium deficiency in cotton (gossypium  
 520 hirsutum). *Journal of Photochemistry & Photobiology B Biology*, 110(9), 1-8.

521 Wang, Y., & Wu, W. H. (2015). Genetic approaches for improvement of the crop potassium  
 522 acquisition and utilization efficiency. *Current Opinion in Plant Biology*, 25, 46-52.

523 Wood, R., & Parish, M. (2003). The mechanisms and viticultural factors governing potassium  
 524 accumulation in the grape berry - part 1.

525 Xiong, D., Liu, X. I., Liu, L., Douthe, C., Li, Y., & Peng, S., et al. (2016). Rapid responses of  
 526 mesophyll conductance to changes of co<sub>2</sub> concentration, temperature and irradiance are  
 527 affected by n supplements in rice. *Plant Cell & Environment*, 38(12), 2541-2550.

528 Xu, H. X. (2010). Characteristics of photosynthesis and functions of the water-water cycle in rice  
 529 (oryza sativa) leaves in response to potassium deficiency. *Physiologia Plantarum*, 131(4),  
 530 614-621.

531 Zhang, W., Zhang, N. S., Zhao, J. J., Guo, Y. P., Zhao, Z. Y., & Mei, L. X. (2017). Potassium  
 532 fertilization improves apple fruit (malus domestica borkh. cv. fuji) development by regulating  
 533 trehalose metabolism. *Journal of Horticultural Science & Biotechnology*, 1-11.

534 Zhao, D., Oosterhuis, D. M., & Bednarz, C. W. (2001). Influence of potassium deficiency on  
 535 photosynthesis, chlorophyll content, and chloroplast ultrastructure of cotton plants.  
 536 *Photosynthetica*, 39(1), 103-109.

537

538

539

540

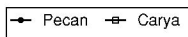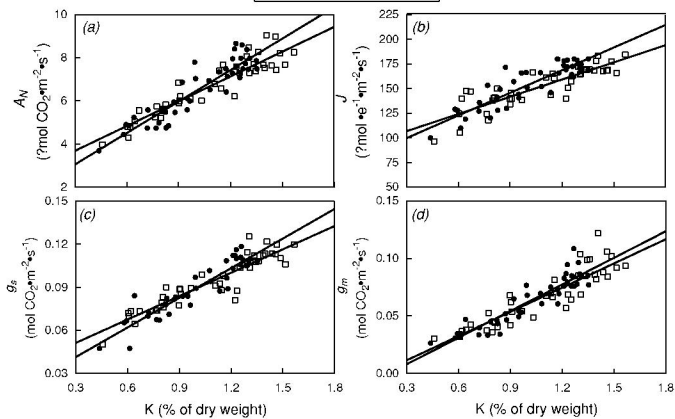

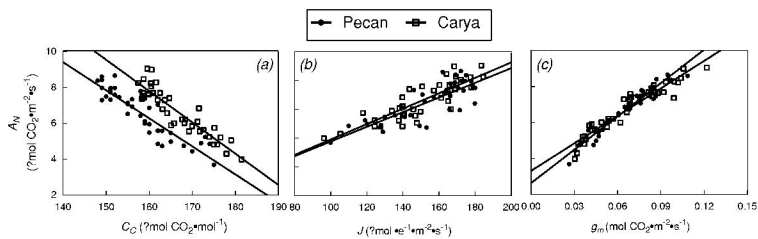



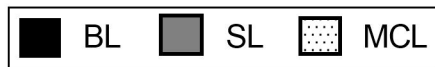

**K0**

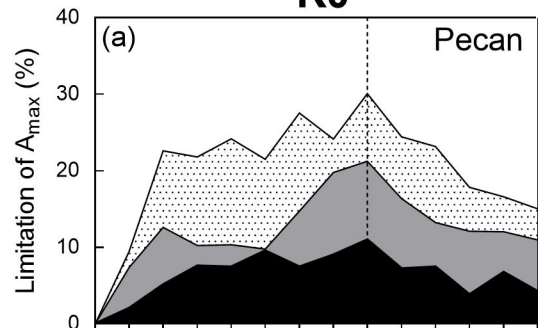

**K2**

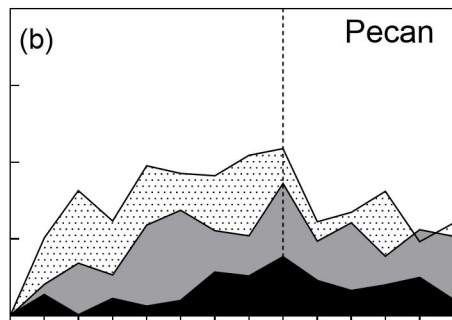

**K5**

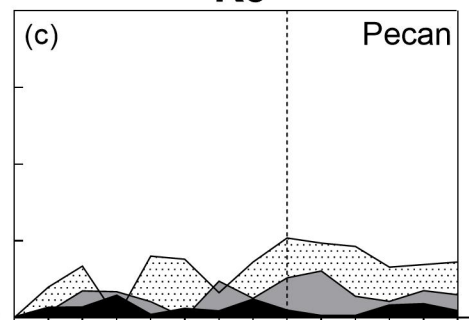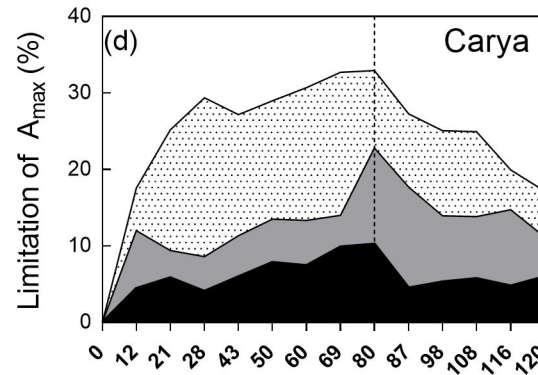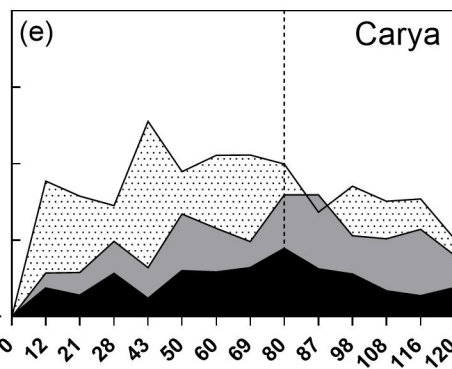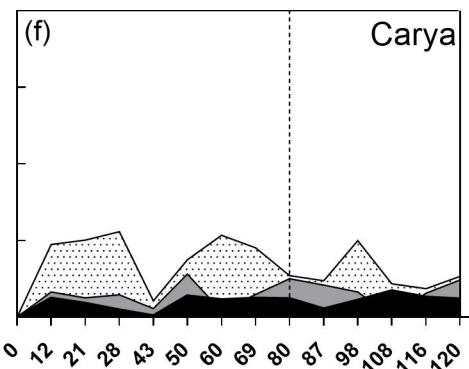

Day of experiment



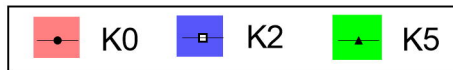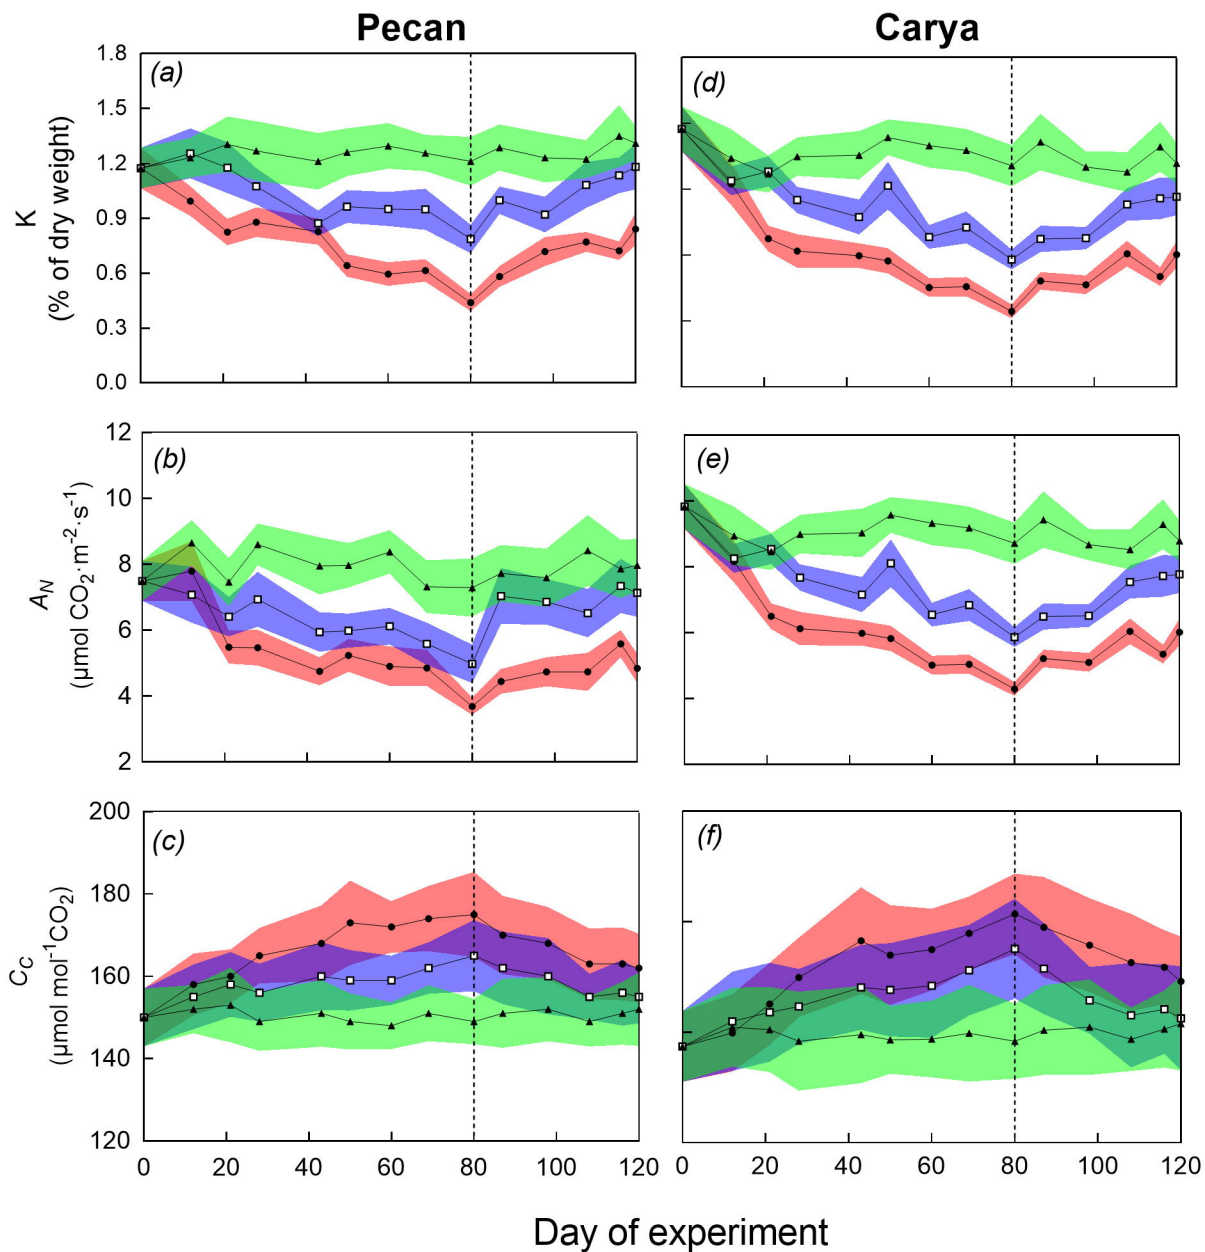

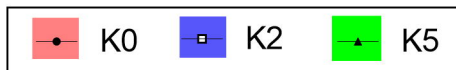

**Pecan**

**Carya**

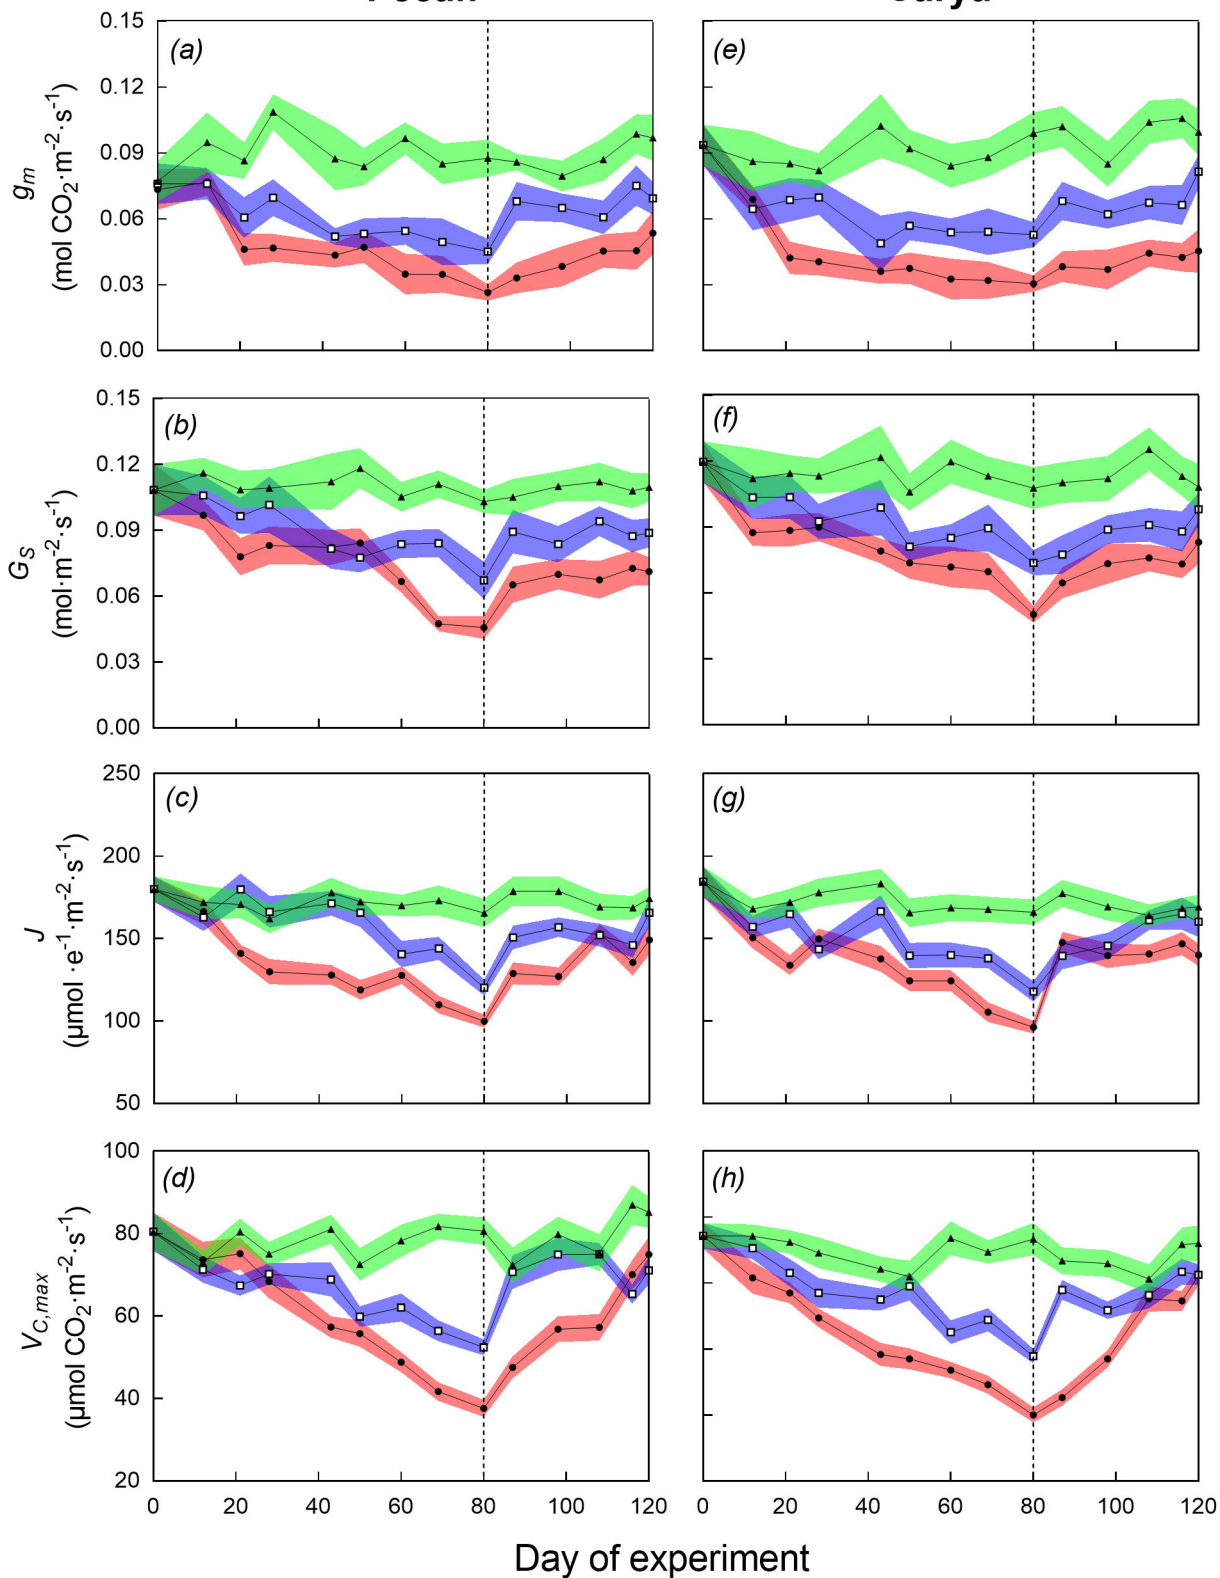

Source: https://www.biorxiv.org/content/10.1101/425629v1.full.pdf
